# Supplementary material
Source: MDPI journal article supplement (https://www.mdpi.com/2079-9284/3/4/40)

# Supplementary Materials: Cosmetics Utilization Practice in Jigjiga Town, Eastern Ethiopia: A Community Based Cross Sectional Study

Arebu I. Bilal, Zelalem Tilahun, Tariku Shimels, Yewubdar B. Gelan and Ebrahim D. Osman

**Table S1.** Questionnaire in English.

| 1. General Information          |                                                  |                                                                 |                                                                                 |           |
|---------------------------------|--------------------------------------------------|-----------------------------------------------------------------|---------------------------------------------------------------------------------|-----------|
| 1.1                             | Age                                              | __ years                                                        |                                                                                 |           |
| 1.2                             | Sex                                              | 1. Male                                                         | 2. Female                                                                       |           |
| 1.3                             | Religion                                         | 1. Muslim<br>2. Orthodox                                        | 3. Catholic<br>4. Protestant                                                    | 5. Others |
| 1.4                             | Ethnicity                                        | 1. Somali<br>2. Amhara                                          | 3. Oromo<br>4. Gurage                                                           | 5. Others |
| 1.5                             | Marital status                                   | 1. Single<br>2. Married                                         | 3. Divorced<br>4. Widowed                                                       |           |
| 1.6                             | Educational status                               | 1. Illiterate<br>2. Grade 1–6<br>3. Grade 7–8                   | 4. Grade 9–10<br>5. Grade 11–12<br>6. Certificate & above                       |           |
| 1.7                             | Occupation                                       | __                                                              |                                                                                 |           |
| 1.8                             | What is your average monthly income?             | __ (Ethiopian Birr)                                             |                                                                                 |           |
| 2. Cosmetic utilization pattern |                                                  |                                                                 |                                                                                 |           |
| 2.1                             | How often do you care about your skin?           | 1. Always<br>2. I don't care                                    | 3. Sometimes                                                                    |           |
| 2.2                             | Have you used any cosmetics in the past 2 weeks? | 1. Yes                                                          | 2. No (if no go to Q 2.19)                                                      |           |
| 2.3                             | If yes, for what purpose did you use?            | 1. Medication<br>2. Cleansing<br>3. Protection<br>4. Anti aging | 5. Beautification<br>6. Hair Coloring<br>7. Whitening<br>8. Others (Mention) __ |           |

Table S1. Cont.

|      |                                                                                                                 |                                                                                                                                                                                         |                                                                                    |
|------|-----------------------------------------------------------------------------------------------------------------|-----------------------------------------------------------------------------------------------------------------------------------------------------------------------------------------|------------------------------------------------------------------------------------|
| 2.4  | Which type of cosmetics do you use usually? (More than one answer is possible)                                  | 1. Body cream & Lotion<br>2. Deodorants & Perfumes<br>3. Shampoo & Conditioner<br>4. Hair cosmetics<br>5. Face powder<br>11. Others (Mention) __                                        | 6. Tooth paste<br>7. Skin Color<br>8. Eye makeup<br>9. lipstick<br>10. Nail Polish |
| 2.5  | How do you select the cosmetics you use?                                                                        | 1. By asking friends who know it earlier<br>2. By smelling or looking the appearance<br>3. By consulting health professionals<br>4. By consulting shop keepers<br>5. Other (mention) __ |                                                                                    |
| 2.6  | What is your main criterion for selecting your cosmetic products?                                               | 1. Affordability of the Price<br>2. Quality of the product<br>3. Easily accessible in the market<br>4. Other (mention) __                                                               |                                                                                    |
| 2.7  | If the answer for the question 2.6. is the “quality” of the product, How do you know the quality of the product | 1. Country of production<br>2. Brand of the product<br>3. Advertised on media<br>4. Most of the people use<br>5. High price of the product<br>6. Others (mention)                       |                                                                                    |
| 2.8  | If the answer for the above question is “country of production”, which countries do you prefer?                 | 1. Local<br>2. Indian                                                                                                                                                                   | 3. Chinese<br>4. Western                                                           |
| 2.9  | How often do you use cosmetics?                                                                                 | 1. Daily<br>2. For Special Occasions                                                                                                                                                    | 3. Sometimes                                                                       |
| 2.10 | How many cosmetic products do you use daily?                                                                    | __                                                                                                                                                                                      |                                                                                    |
| 2.11 | For at least how many times do you use a specific cosmetic daily?                                               | 1. Once<br>2. Twice                                                                                                                                                                     | 3. Three times<br>4. More than three times                                         |
| 2.12 | From where do you buy (get) your cosmetics?                                                                     | 1. Supermarket<br>2. Pharmacy                                                                                                                                                           | 3. Shop<br>4. Others (mention) __                                                  |

Table S1. Cont.

|      |                                                                                                         |                                                                                                                                                                                                                                       |                                                                |
|------|---------------------------------------------------------------------------------------------------------|---------------------------------------------------------------------------------------------------------------------------------------------------------------------------------------------------------------------------------------|----------------------------------------------------------------|
| 2.14 | Do you read information on the containers of your cosmetic products?                                    | 1. Yes                                                                                                                                                                                                                                | 2. No                                                          |
| 2.15 | If yes to the above question, what information do you read? (More than one answer is possible)          | 1. Brand name<br>2. Ingredients<br>3. Special remarks                                                                                                                                                                                 | 4. Expiry Date<br>5. Use instruction<br>6. Others (mention) __ |
| 2.16 | If yes, when do you read information on the containers of your cosmetic products?                       | 1. Always when purchasing a product<br>2. Only when purchasing a product for the first time<br>3. When observing some kind of side effect<br>4. When effectiveness of the product declined                                            |                                                                |
| 2.17 | Do you share cosmetic products with your family/friends?                                                | 1. Yes                                                                                                                                                                                                                                | 2. No                                                          |
| 2.18 | How do you use different types of cosmetics?                                                            | 1. Use each cosmetics alone<br>2. Use different types by mixing<br>3. Use by mixing with water<br>4. Use by mixing with saliva                                                                                                        |                                                                |
| 2.19 | Which instruction of use do you think is one should strictly follow? (More than one answer is possible) | 1. Washing your hands and the respective body part before application of cosmetics<br>2. Cleansing body parts before sleeping to remove cosmetics<br>3. Avoiding exposure to sun light for a lengthy period<br>4. Others (mention) __ |                                                                |
| 2.20 | Have you used any traditional cosmetics in the past 2 weeks?                                            | 1. Yes                                                                                                                                                                                                                                | 2. No                                                          |
| 2.21 | If yes for the above question, mention local names of the traditional cosmetics?                        | __                                                                                                                                                                                                                                    |                                                                |

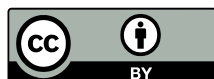

Supplement: s1 [file s1]
